# Supplementary material
Source: PubMed Central journal article supplement (PMC6495364)
Supplement: jamacardiol-4-569-s001.pdf [file jamacardiol-4-569-s001.pdf]

## Supplementary Online Content

Cook CM, Ahmad Y, Howard JP, et al. Association between physiological stenosis severity and angina-limited exercise time in patients with stable coronary artery disease. *JAMA Cardiol*. Published online May 1, 2019.  
doi:10.1001/jamacardio.2019.1139

**eMethods.** Methods

**eFigure 1.** Experimental apparatus and study protocol

**eTable 1.** Calculation of physiologic indices

**eTable 2.** Baseline characteristics

**eTable 3.** Per vessel anatomical and physiological stenosis characteristics

**eTable 4.** Univariate linear regression of baseline characteristics and anatomical stenosis characteristics on angina-limited exercise time

**eFigure 2.** The relationship between angina-limited exercise time and anatomical stenosis severity

This supplementary material has been provided by the authors to give readers additional information about their work.

## **eMethods. Methods**

The patient was positioned on the catheterization laboratory table and secured to a premounted supine cycle ergometer (Lode Angio, Lode, Groningen; eFigure 1). The ergometer was connected to a laptop computer with software (Lode Export Manager 10, V 10.5.1, Lode, Groningen) to initiate the exercise protocol and acquire performance data. The target-vessel was intubated with a standard 6F guide catheter from the right radial artery. Intra-arterial unfractionated heparin (70-100 U/kg) and intracoronary nitroglycerin (300mcg) were given prior to coronary angiography and physiological measurements.

The optimal working view was determined, and a standard coronary guidewire was advanced distally to secure the target vessel. A dual pressure and velocity sensor 0.014-in intracoronary wire (Combwire XT, Volcano Corp, California) connected to a stand-alone console (Combomap, Volcano Corp, California; eFigure 1) was then advanced to the tip of the guiding catheter and the pressure signals normalized. The Combwire tip-mounted sensor was advanced distal to the stenosis by a minimum of 15mm and its position recorded cineographically. An optimal Doppler velocity trace was obtained by rotational manipulation of the Combwire. Continuous pressure-flow measurements were performed under resting conditions, during a 2-minute intravenous infusion of adenosine and during an incremental exercise protocol. The order of adenosine and exercise was randomly assigned. A return to baseline hemodynamic conditions was mandated between each stage of the experimental protocol.

Prior to removal from the patient, the Combwire was returned to the catheter tip to assess for pressure drift. Stenting was then performed according to standard clinical practice. Stent optimization was performed at the operator's discretion. Following stenting, the Combwire was reintroduced, advanced to the guiding catheter tip and renormalized as before. The Combwire was advanced to the same intracoronary position as previous, with cross-reference to the cine-acquired roadmap image for confirmation. All aforementioned stages of the pre-PCI study protocol were then repeated, including the incremental exercise protocol. Schematic representation of the study protocol is summarized in eFigure 1.

## **Exercise protocol**

An incremental exercise protocol starting at 40 Watts and increasing by 20 Watts every minute was used for all patients. The guiding catheter was disengaged from the coronary ostium for the duration of exercise to prevent vessel trauma and to permit central aortic pressure waveform recording without damping. Exercise was continued until the development of rate-limiting angina symptoms (pre-PCI) or physical exhaustion (post-PCI).

## **Data analysis**

The electrocardiogram, pressure waveforms and coronary flow velocity signals were directly extracted from the digital archive of the device console (ComboMap, V 1.9, Volcano Corporation) for offline analysis. Exercise data were exported from the ergometer software package using a dedicated export manager (Lode Export Manager 10, V 10.5.1, Lode, Groningen).

**eFigure 1**

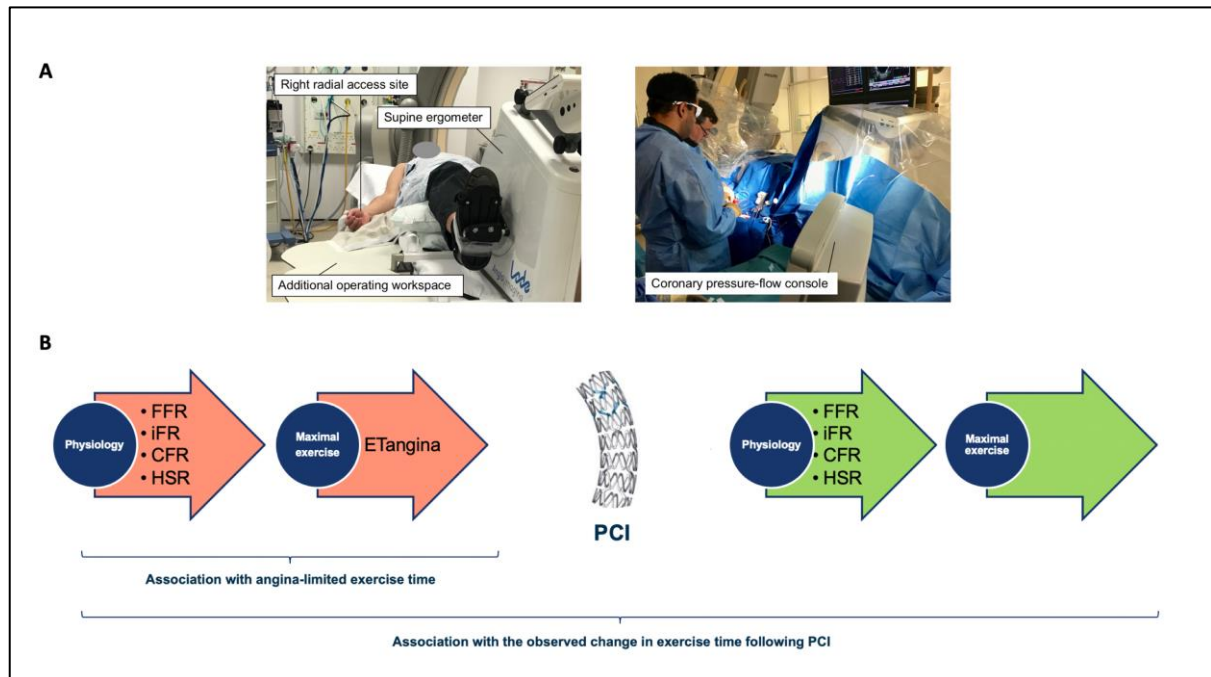

**eFigure 1. Experimental apparatus and study protocol**

(A): Experimental apparatus and coronary catheter laboratory set up. (B): Schematic representation of the study protocol.

**eTable 1. Calculation of physiologic indices**

|     |   |                                                                          |
|-----|---|--------------------------------------------------------------------------|
| Pa  | = | Proximal (aortic) pressure (mmHg)                                        |
| Pd  | = | Distal (coronary) pressure (mmHg)                                        |
| FFR | = | Pd/Pa at whole-cycle during pharmacological hyperemia                    |
| iFR | = | Pd/Pa at baseline over iFR window                                        |
| HSR | = | Pa-Pd (mmHg) / Whole - cycle hyperemic flow velocity (cm/s)              |
| CFR | = | Whole-cycle hyperemic flow velocity / Whole-cycle baseline flow velocity |

Pa indicates aortic pressure; Pd, distal coronary pressure; FFR, fractional flow reserve; iFR, instantaneous wave-Free Ratio; HSR, hyperemic stenosis resistance; CFR, coronary flow reserve

**eTable 2. Baseline characteristics**

| <b>Demographics (n=23)</b>     |            |
|--------------------------------|------------|
| Age (years)                    | 60.6 (8.1) |
| Male                           | 21 (91%)   |
| Diabetes                       | 1 (4%)     |
| Hypertension                   | 14 (61%)   |
| Hyperlipidaemia                | 16 (70%)   |
| History of smoking             | 9 (39%)    |
| Previous myocardial infarction | 3 (13%)    |
| LVEF < 40%                     | 0 (0%)     |
| <b>CCS class</b>               |            |
| I                              | 1 (4%)     |
| II                             | 9 (39%)    |
| III                            | 13 (57%)   |
| <b>Baseline hemodynamics</b>   |            |
| Systolic blood pressure (mmHg) | 140 (18)   |
| Heart rate (bpm)               | 68 (12)    |
| <b>Medications</b>             |            |
| Aspirin                        | 23 (100%)  |
| Clopidogrel                    | 23 (100%)  |
| Beta-blockers                  | 16 (70%)   |
| Statin                         | 22 (96%)   |
| ACE-I/ARB                      | 17 (74%)   |
| Nitrates                       | 6 (26%)    |
| CCB                            | 9 (39%)    |

PCI indicates percutaneous coronary intervention; LVEF, left ventricular ejection fraction; CCS, Canadian Cardiovascular Society; bpm, beats per minute; ACE-I, angiotensin converting enzyme inhibitor; ARB, angiotensin II receptor blocker; CCB, calcium channel blocker.

**eTable 3. Per vessel anatomical and physiological stenosis characteristics**

| Vessel | Proximal stenosis location | Diameter stenosis by QCA | FFR pre-PCI         | iFR pre-PCI         | HSR pre-PCI         | CFR pre-PCI         | FFR post-PCI        | iFR post-PCI        | HSR post-PCI        | CFR post-PCI        | ΔFFR                | ΔiFR                | ΔHSR                  | ΔCFR                |
|--------|----------------------------|--------------------------|---------------------|---------------------|---------------------|---------------------|---------------------|---------------------|---------------------|---------------------|---------------------|---------------------|-----------------------|---------------------|
| LAD    | 64%<br>(9/14)              | 72.2%<br>(11.3)          | 0.50<br>(0.43-0.73) | 0.49<br>(0.33-0.87) | 1.65<br>(0.79-3.38) | 1.43<br>(1.11-2.29) | 0.89<br>(0.84-0.91) | 0.94<br>(0.93-0.98) | 0.27<br>(0.13-0.38) | 2.73<br>(2.28-3.12) | 0.32<br>(0.18-0.42) | 0.33<br>(0.09-0.57) | -0.87<br>(-2.38-0.44) | 1.41<br>(0.75-1.50) |
| Cx     | 80%<br>(4/5)               | 74.5%<br>(5.8)           | 0.64<br>(0.54-0.80) | 0.79<br>(0.49-0.87) | 1.22<br>(0.84-1.61) | 2.12<br>(1.30-2.15) | 0.97<br>(0.93-1.01) | 1.00<br>(0.98-1.01) | 0.04<br>(0.00-0.25) | 2.77<br>(2.58-3.20) | 0.29<br>(0.20-0.37) | 0.14<br>(0.06-0.28) | -0.95<br>(-2.70-0.55) | 0.70<br>(0.44-1.19) |
| RCA    | 0%<br>0/4                  | 84.5%<br>(7.3)           | 0.43<br>(0.29-0.60) | 0.61<br>(0.40-0.78) | 2.95<br>(1.88-5.27) | 1.23<br>(1.08-1.36) | 0.96<br>(0.94-0.97) | 1.00<br>(0.98-1.01) | 0.10<br>(0.09-0.11) | 2.73<br>(2.50-3.04) | 0.49<br>(0.36-0.62) | 0.37<br>(0.23-0.56) | -2.81<br>(-5.13-1.78) | 1.51<br>(1.14-1.96) |

Values are n, mean ± SD, median (IQR) or n (%). LAD indicates left anterior descending; Cx, circumflex; RCA, right coronary artery; QCA, quantitative coronary angiography.

**eTable 4. Univariate linear regression of baseline characteristics and anatomical stenosis characteristics on angina-limited exercise time.**

| Univariate predictors of ET <sub>angina</sub> |                     |              |         |
|-----------------------------------------------|---------------------|--------------|---------|
| Variable                                      | $\beta$ coefficient | 95% CI       | p value |
| Patient characteristics                       |                     |              |         |
| Age                                           | -2.27               | -6.5 – 1.94  | 0.27    |
| Male                                          | 32.3                | -88.5 – 153  | 0.58    |
| Diabetes                                      | -48.8               | -215 – 118   | 0.55    |
| Hypertension                                  | -24.8               | -94.1 – 44.6 | 0.47    |
| Hyperlipidaemia                               | -19.3               | -93.3 – 54.7 | 0.59    |
| History of smoking                            | -13.4               | -83.4 – 56.6 | 0.70    |
| Previous myocardial infarction                | -62.1               | -160 – 35.8  | 0.21    |
| Number of antianginal medications             | -3.84               | -59.2 – 51.5 | 0.89    |
| Anatomical stenosis characteristics           |                     |              |         |
| Reference vessel diameter (mm)                | 3.93                | -76.0 – 83.9 | 0.92    |
| Stenosis diameter (%)                         | -0.68               | -4.05 – 2.70 | 0.68    |
| Stenosis length (mm)                          | 0.93                | -8.56 – 9.28 | 0.93    |
| Physiological stenosis characteristics        |                     |              |         |
| FFR                                           | 226                 | 59.5 – 393   | 0.01    |
| iFR                                           | 198                 | 97.2 – 299   | <0.001  |
| Log HSR                                       | -122                | -191 – -52.2 | <0.01   |
| CFR                                           | 44.7                | 0.21 – 91.7  | 0.05    |

ET<sub>angina</sub> indicates the change in exercise time following PCI. All abbreviations as per eTable 1



**eFigure 2**

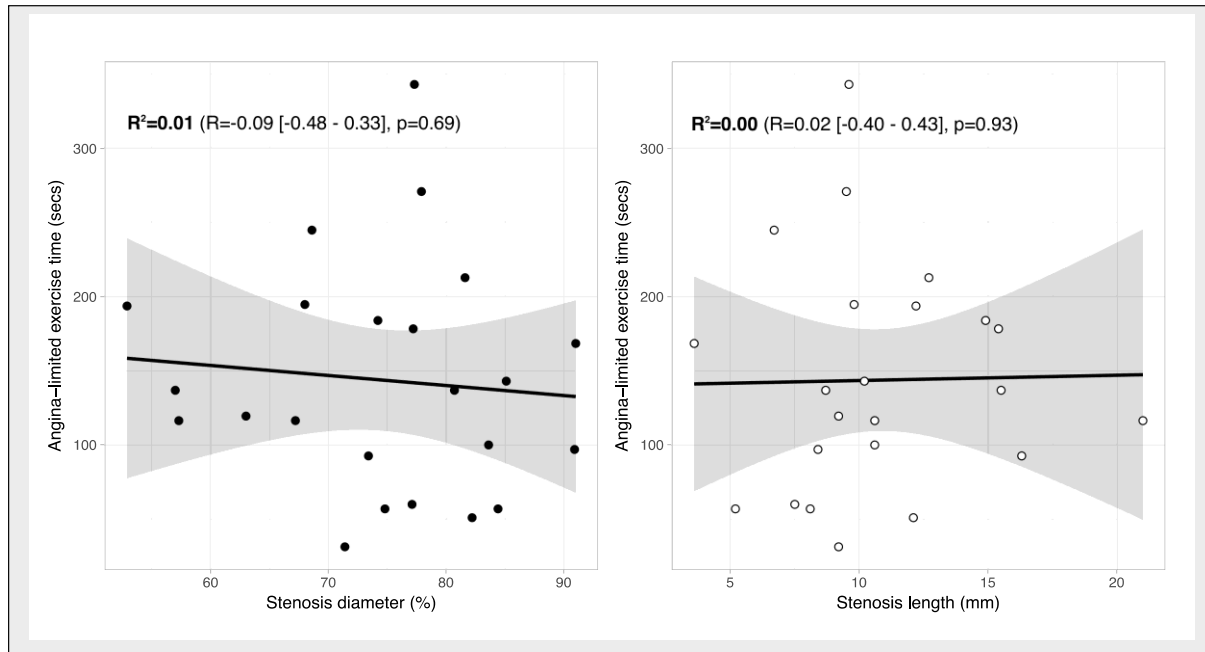

**eFigure 2. The relationship between angina-limited exercise time and anatomical stenosis severity**

Scatter plots of the relationships between angina-limited exercise time and percentage stenosis diameter (black) and stenosis length in millimetres (white).
